# Supplementary material for: Immune sensing of food allergens promotes avoidance behaviour
Source: PubMed Central journal article supplement (PMC10432274; doi:10.1038/s41586-023-06362-4), 2023-07-12
Supplement: 41586_2023_6362_MOESM1_ESM.pdf [file 41586_2023_6362_MOESM1_ESM.pdf]

## Supplementary information

---

# Immune sensing of food allergens promotes avoidance behaviour

---

In the format provided by the  
authors and unedited

## Supplementary Information Figure Guide

**SI Figure 1.** Gating strategy for immune cell populations.

### Supplementary Information Figure Legend

**Supplementary Fig. 1 | Gating strategies for flow cytometric analysis.** **a**, Gating strategy to identify live CD45<sup>+</sup> singlet enteric cells presented in Extended Data Fig. 2b, 2c, 4k, and 6f. **b**, Gating strategy to identify enteric mast cells (CD19<sup>-</sup> CD3<sup>-</sup> CD11b<sup>-</sup> CD117<sup>+</sup> FcεRI<sup>+</sup>) presented in Extended Data Fig. 2b, 2c, 4k, and 6f. **c**, Gating strategy to identify enteric T cell subsets (Lineage<sup>-</sup> CD4<sup>+</sup> TCRβ<sup>+</sup>, Foxp3<sup>+</sup> or Gata3<sup>+</sup> or Tbet<sup>+</sup> or RORγt<sup>+</sup>) or ILC2s (Lineage<sup>-</sup> CD4<sup>-</sup> TCRβ<sup>-</sup> CD90.2<sup>+</sup> Gata3<sup>+</sup>) presented in Extended Data Fig. 2b and 2c. **d**, Gating strategy to identify enteric dendritic cells (CD11c<sup>+</sup> MHCII<sup>+</sup>), macrophages (F4/80<sup>+</sup> MHCII<sup>+</sup>), or monocytes (F4/80<sup>-</sup> CD11b<sup>+</sup> Ly6c<sup>+</sup>) presented in Extended Data Fig. 2b and 2c. **e**, Gating strategy to identify enteric neutrophils (MHCII<sup>-</sup> CD11b<sup>+</sup> Gr-1<sup>+</sup>) presented in Extended Data Fig. 2b and 2c. **f**, Gating strategy to identify enteric eosinophils (SiglecF<sup>+</sup> MHCII<sup>-</sup>) presented in Extended Data Fig. 2b, 2c, and 6g. **g**, Gating strategy to identify peritoneal mast cells (live CD45<sup>+</sup> Lineage<sup>-</sup> CD117<sup>+</sup> IgE<sup>+</sup> singlets) as presented in Extended Data Fig. 4k. **h**, Gating strategy to identify blood basophils (live CD45<sup>+</sup> Lineage<sup>-</sup> CD49b<sup>+</sup> IgE<sup>+</sup> singlets) presented in Extended Data Fig. 4k. Each panel is representative of at least two independent experiments.

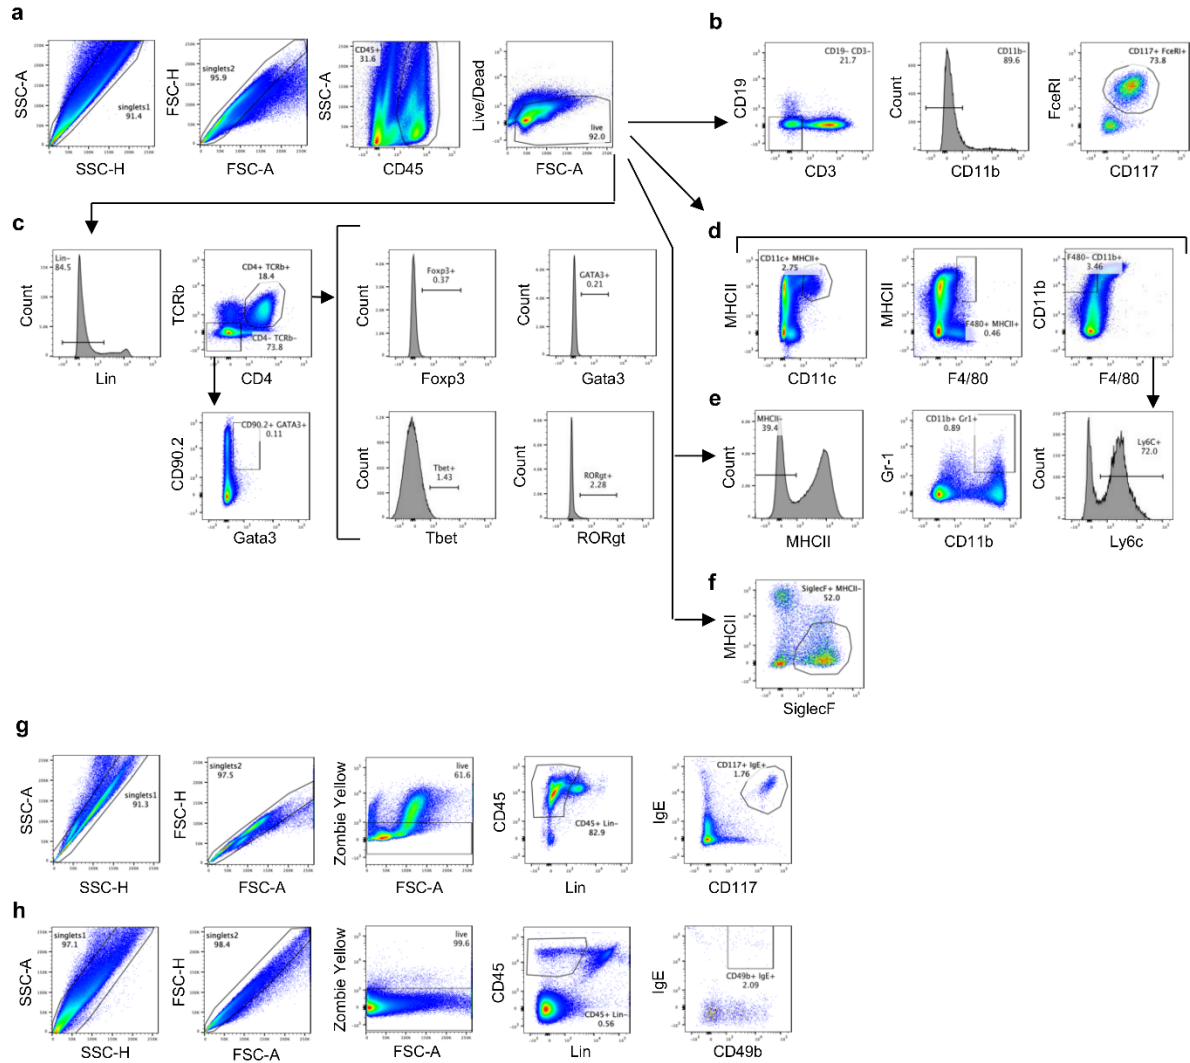

**Supplementary Figure 1**
